# Supplementary material for: Marital status is associated with superior survival in patients with esophageal cancer: a Surveillance, Epidemiology, and End Results study
Source: PubMed Central journal article supplement (PMC5707073; doi:10.18632/oncotarget.21609), 2017-10-07
Supplement: oncotarget-08-95965-s001.pdf [file oncotarget-08-95965-s001.pdf]

## Marital status is associated with superior survival in patients with esophageal cancer: a surveillance, epidemiology, and end results study

### SUPPLEMENTARY MATERIALS

**Supplementary Table 1: Multivariate analysis of marital status on overall and esophageal cancer-caused specific survival based on different age stratifications**

| Characteristics | Overall Survival HR (95% CI) | P value | Cancer-specific Survival HR (95% CI) | P value |
|-----------------|------------------------------|---------|--------------------------------------|---------|
| <b>≤60</b>      |                              |         |                                      |         |
| Non-married     | 1.17 (1.14-1.21)             | <0.001  | 1.15 (1.11-1.19)                     | <0.001  |
| Married         | Reference                    |         | Reference                            |         |
| <b>60-80</b>    |                              |         |                                      |         |
| Non-married     | 1.17 (1.14-1.19)             | <0.001  | 1.15 (1.12-1.18)                     | <0.001  |
| Married         | Reference                    |         | Reference                            |         |
| <b>≥80</b>      |                              |         |                                      |         |
| Non-married     | 1.17 (1.12-1.22)             | <0.001  | 1.161 (1.10-1.22)                    | <0.001  |
| Married         | Reference                    |         | Reference                            |         |

Adjusting for gender, race/ethnicity, household income, histology, tumor site, SEER stages, therapy.

**Supplementary Table 2: Multivariate analysis of marital status on overall and esophageal cancer-caused specific survival based on different gender**

| Characteristics | Overall Survival HR (95% CI) | P value | Cancer-specific Survival HR (95% CI) | P value |
|-----------------|------------------------------|---------|--------------------------------------|---------|
| <b>Male</b>     |                              |         |                                      |         |
| Non-married     | 1.18 (1.16-1.21)             | <0.001  | 1.16 (1.14-1.19)                     | <0.001  |
| Married         | Reference                    |         | Reference                            |         |
| <b>Female</b>   |                              |         |                                      |         |
| Non-married     | 1.13 (1.09-1.17)             | <0.001  | 1.13 (1.09-1.18)                     | <0.001  |
| Married         | Reference                    |         | Reference                            |         |

Adjusting for age, race/ethnicity, household income, histology, tumor site, SEER stages, therapy.

**Supplementary Table 3: Multivariate analysis of marital status on overall and esophageal cancer-caused specific survival based on race/ethnicity diversity**

| Characteristics       | Overall Survival HR (95% CI) | P value | Cancer-specific Survival HR (95% CI) | P value |
|-----------------------|------------------------------|---------|--------------------------------------|---------|
| <b>White</b>          |                              |         |                                      |         |
| Non-married           | 1.17 (1.15-1.19)             | <0.001  | 1.16 (1.13-1.19)                     | <0.001  |
| Married               | Reference                    |         | Reference                            |         |
| <b>Black</b>          |                              |         |                                      |         |
| Non-married           | 1.17 (1.12-1.23)             | <0.001  | 1.13 (1.07-1.18)                     | <0.001  |
| Married               | Reference                    |         | Reference                            |         |
| <b>Others/Unknown</b> |                              |         |                                      |         |
| Non-married           | 1.20 (1.12-1.30)             | <0.001  | 1.22 (1.12-1.33)                     | <0.001  |
| Married               | Reference                    |         | Reference                            |         |

Adjusting for age, gender, household income, histology, tumor site, SEER stages, therapy.

**Supplementary Table 4: Multivariate analysis of marital status on overall and esophageal cancer-caused specific survival based on household income**

| Characteristics        | Overall Survival HR (95% CI) | P value | Cancer-specific Survival HR (95% CI) | P value |
|------------------------|------------------------------|---------|--------------------------------------|---------|
| <b>Top quintile</b>    |                              |         |                                      |         |
| Non-married            | 1.19 (1.14-1.23)             | <0.001  | 1.17 (1.12-1.22)                     | <0.001  |
| Married                | Reference                    |         | Reference                            |         |
| <b>2nd quintile</b>    |                              |         |                                      |         |
| Non-married            | 1.19 (1.14-1.23)             | <0.001  | 1.19 (1.13-1.24)                     | <0.001  |
| Married                | Reference                    |         | Reference                            |         |
| <b>3rd quintile</b>    |                              |         |                                      |         |
| Non-married            | 1.17 (1.12-1.21)             | <0.001  | 1.14 (1.10-1.19)                     | <0.001  |
| Married                | Reference                    |         | Reference                            |         |
| <b>4th quintile</b>    |                              |         |                                      |         |
| Non-married            | 1.16 (1.12-1.21)             | <0.001  | 1.16 (1.11-1.21)                     | <0.001  |
| Married                | Reference                    |         | Reference                            |         |
| <b>Bottom quintile</b> |                              |         |                                      |         |
| Non-married            | 1.17 (1.13-1.22)             | <0.001  | 1.15 (1.10-1.21)                     | <0.001  |
| Married                | Reference                    |         | Reference                            |         |

Adjusting for age, gender, race/ethnicity, histology, tumor site, SEER stages, therapy.

**Supplementary Table 5: Multivariate analysis of marital status on overall and esophageal cancer-caused specific survival based on different histotypes**

| Characteristics | Overall Survival HR (95% CI) | P value | Cancer-specific Survival HR (95% CI) | P value |
|-----------------|------------------------------|---------|--------------------------------------|---------|
| <b>ACE</b>      |                              |         |                                      |         |
| Non-married     | 1.19 (1.16-1.22)             | <0.001  | 1.18 (1.15-1.22)                     | <0.001  |
| Married         | Reference                    |         | Reference                            |         |
| <b>SCC</b>      |                              |         |                                      |         |
| Non-married     | 1.16 (1.13-1.19)             | <0.001  | 1.14 (1.11-1.17)                     | <0.001  |
| Married         | Reference                    |         | Reference                            |         |

Adjusting for age, gender, race/ethnicity, household income, tumor site, SEER stages, therapy.

**Supplementary Table 6: Multivariate analysis of marital status on overall and esophageal cancer-caused specific survival based on different tumor sites**

| Characteristics     | Overall Survival HR (95% CI) | P value | Cancer-specific Survival HR (95% CI) | P value |
|---------------------|------------------------------|---------|--------------------------------------|---------|
| <b>Upper third</b>  |                              |         |                                      |         |
| Non-married         | 1.12 (1.06-1.17)             | <0.001  | 1.11 (1.04-1.18)                     | 0.001   |
| Married             | Reference                    |         | Reference                            |         |
| <b>Middle third</b> |                              |         |                                      |         |
| Non-married         | 1.17 (1.13-1.21)             | <0.001  | 1.15 (1.11-1.20)                     | <0.001  |
| Married             | Reference                    |         | Reference                            |         |
| <b>Lower third</b>  |                              |         |                                      |         |
| Non-married         | 1.18 (1.16-1.21)             | <0.001  | 1.17 (1.14-1.20)                     | <0.001  |
| Married             | Reference                    |         | Reference                            |         |
| <b>Overlapping</b>  |                              |         |                                      |         |
| Non-married         | 1.14 (1.05-1.23)             | 0.001   | 1.106 (1.02-1.21)                    | 0.021   |
| Married             | Reference                    |         | Reference                            |         |

Adjusting for age, gender, race/ethnicity, household income, histology, SEER stages, therapy.

**Supplementary Table 7: Multivariate analysis of marital status on overall and esophageal cancer-caused specific survival based on different cancer stages**

| Characteristics  | Overall Survival HR (95% CI) | P value          | Cancer-specific Survival HR (95% CI) | P value          |
|------------------|------------------------------|------------------|--------------------------------------|------------------|
| <b>In situ</b>   |                              |                  |                                      |                  |
| Non-married      | 1.30 (1.06-1.59)             | <b>0.011</b>     | 1.24 (0.88-1.73)                     | 0.222            |
| Married          | Reference                    |                  | Reference                            |                  |
| <b>Localized</b> |                              |                  |                                      |                  |
| Non-married      | 1.19(1.15-1.24)              | <b>&lt;0.001</b> | 1.17 (1.12-1.22)                     | <b>&lt;0.001</b> |
| Married          | Reference                    |                  | Reference                            |                  |
| <b>Regional</b>  |                              |                  |                                      |                  |
| Non-married      | 1.15 (1.11-1.18)             | <b>&lt;0.001</b> | 1.12 (1.08-1.17)                     | <b>&lt;0.001</b> |
| Married          | Reference                    |                  | Reference                            |                  |
| <b>Distant</b>   |                              |                  |                                      |                  |
| Non-married      | 1.17 (1.13-1.20)             | <b>&lt;0.001</b> | 1.16 (1.12-1.20)                     | <b>&lt;0.001</b> |
| Married          | Reference                    |                  | Reference                            |                  |

Adjusting for age, gender, race/ethnicity, household income, histology, tumor site, therapy.

**Supplementary Table 8: Multivariate analysis of marital status on overall and esophageal cancer-caused specific survival based on different therapies**

| Characteristics              | Overall Survival HR (95% CI) | P value          | Cancer-specific Survival HR (95% CI) | P value          |
|------------------------------|------------------------------|------------------|--------------------------------------|------------------|
| <b>Radiation and surgery</b> |                              |                  |                                      |                  |
| Non-married                  | 1.11 (1.05-1.17)             | <b>&lt;0.001</b> | 1.09(1.03-1.16)                      | <b>0.004</b>     |
| Married                      | Reference                    |                  | Reference                            |                  |
| <b>Radiation</b>             |                              |                  |                                      |                  |
| Non-married                  | 1.19 (1.13-1.25)             | <b>&lt;0.001</b> | 1.12 (1.05-1.19)                     | <b>0.001</b>     |
| Married                      | Reference                    |                  | Reference                            |                  |
| <b>Surgery</b>               |                              |                  |                                      |                  |
| Non-married                  | 1.13 (1.10-1.16)             | <b>&lt;0.001</b> | 1.11 (1.08-1.14)                     | <b>&lt;0.001</b> |
| Married                      | Reference                    |                  | Reference                            |                  |
| <b>None</b>                  |                              |                  |                                      |                  |
| Non-married                  | 1.21 (1.17-1.24)             | <b>&lt;0.001</b> | 1.22 (1.18-1.27)                     | <b>&lt;0.001</b> |
| Married                      | Reference                    |                  | Reference                            |                  |

Adjusting for age, gender, race/ethnicity, household income, histology, tumor site, and SEER stage.

**Supplementary Table 9: Multivariate analysis of marital status on overall and esophageal cancer-caused specific survival based on insurance**

| <b>Characteristics</b> | <b>Overall Survival HR (95% CI)</b> | <b>P value</b>   | <b>Cancer-specific Survival HR (95% CI)</b> | <b>P value</b>   |
|------------------------|-------------------------------------|------------------|---------------------------------------------|------------------|
| <b>Insured</b>         |                                     |                  |                                             |                  |
| Non-married            | 1.19 (1.15-1.24)                    | <b>&lt;0.001</b> | 1.19 (1.14-1.24)                            | <b>&lt;0.001</b> |
| Married                | Reference                           |                  | Reference                                   |                  |
| <b>Uninsured</b>       |                                     |                  |                                             |                  |
| Non-married            | 1.08 (0.99-1.17)                    | 0.076            | 1.13 (1.03-1.25)                            | <b>0.012</b>     |
| Married                | Reference                           |                  | Reference                                   |                  |

Adjusting for age, gender, race/ethnicity, household income, histology, tumor site, SEER stage and therapy.
